# Supplementary material for: Blue copper protein analogue: synthesis and characterization of copper complexes of the N2S2 macrocycle 1,8-dithia-4,11-diazacyclotetradecane
Source: Royal Society of Chemistry journal article supplement (doi:10.1039/c5dt03389f), 2015-01-01

## Supplementary data for

# Blue Copper Protein Analogue: Synthesis and Characterization of Copper Complexes of the NSNS Macrocyclic 1,8-dithia-4,11- diazacyclotetradecane

Tia L. Walker<sup>\*a</sup>, Sam Mula<sup>b</sup>, Wilhelm Malasi<sup>c</sup>, James T. Engle<sup>c</sup>, Christopher J. Ziegler<sup>c</sup>, A. van der Est<sup>b</sup>, Jody Modarelli<sup>d</sup> and Michael J. Taschner<sup>c</sup>

*Department of Chemistry, Physics and Astronomy*

*Indiana University Northwest*

*Gary, IN 46408, USA*

Email: [tialwalk@iun.edu](mailto:tialwalk@iun.edu)

### Table of Contents

General Information

Page S2

High Resolution Mass Spectrometry

Page S2 – S3

<sup>1</sup>H NMR

Page S4

IR

Page S5-S6

**General information**

**Instrumentation:** All <sup>1</sup>H and <sup>13</sup>C-NMR spectra were obtained using a Varian Mercury 300 spectrometer, operating at either 300 MHz (<sup>1</sup>H) or 75 MHz (<sup>13</sup>C). Chemical shifts were referenced relative to the residual solvent peak.

**Cu High Resolution Mass Spectrometry:** [Cu+(14aneNSNS)]PF<sub>6</sub><sup>-</sup>

| Mass Spectrometry & Proteomics Facility |                            | Mass Spectrum SmartFormula Report |                      |
|-----------------------------------------|----------------------------|-----------------------------------|----------------------|
| <b>Analysis Info</b>                    |                            | Acquisition Date                  | 6/25/2014 2:45:46 PM |
| Analysis Name                           | D:\Data\062514\N2S2Cu(T).d | Operator                          | Nonka Sevova         |
| Method                                  | cal100-1600.m              | Instrument / Ser#                 | microTOF 10314       |
| Sample Name                             | N2S2Cu(T)                  | Comment                           | IN ACN               |
| <b>Acquisition Parameter</b>            |                            |                                   |                      |
| Source Type                             | ESI                        | Ion Polarity                      | Positive             |
| Focus                                   | Not active                 | Set Capillary                     | 4500 V               |
| Scan Begin                              | 50 m/z                     | Set End Plate Offset              | -500 V               |
| Scan End                                | 3000 m/z                   | n/a                               | n/a                  |
|                                         |                            | Set Nebulizer                     | 0.3 Bar              |
|                                         |                            | Set Dry Heater                    | 180 °C               |
|                                         |                            | Set Dry Gas                       | 4.0 l/min            |
|                                         |                            | Set Divert Valve                  | Source               |

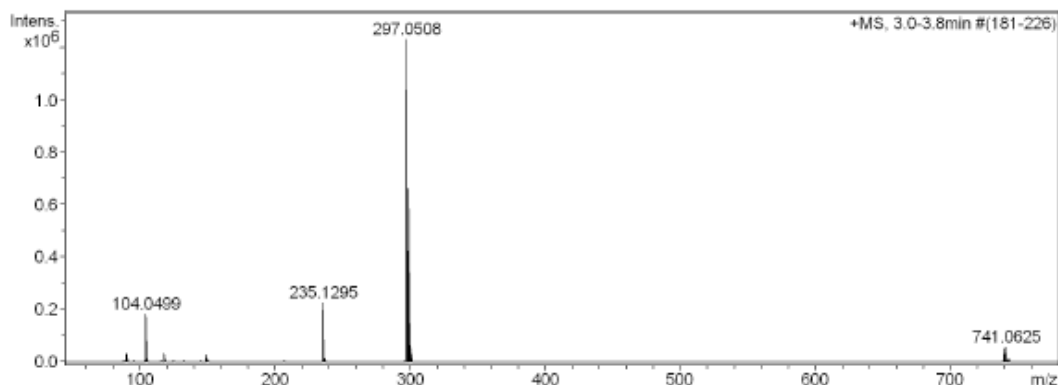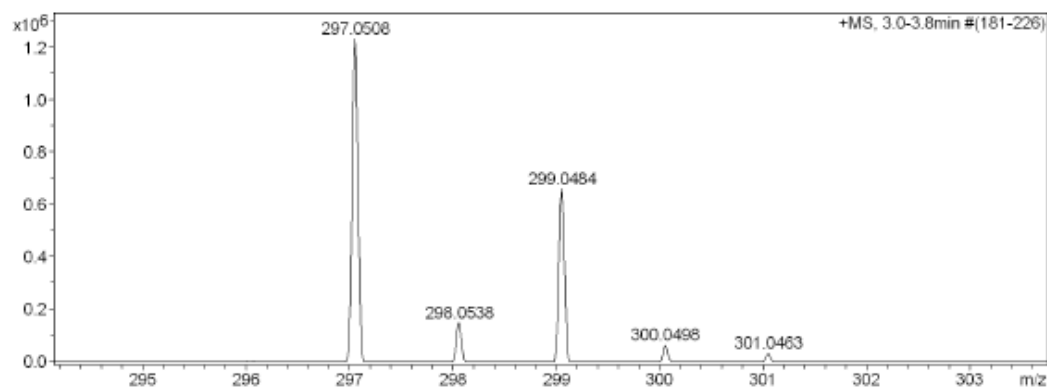

| Meas. m/z | # | Formula              | m/z      | err [ppm] | Mean err [ppm] | rdb | N-Rule |
|-----------|---|----------------------|----------|-----------|----------------|-----|--------|
| 297.0508  | 1 | C 10 H 22 Cu N 2 S 2 | 297.0515 | 2.2       | 2.9            | 0.5 | ok     |

Cu High Resolution Mass Spectrometry: [Cu<sup>2+</sup>(14aneNSNS)]ClO<sub>4</sub><sup>-</sup>

| Mass Spectrometry & Proteomics Facility |                                       |                       |           | Mass Spectrum SmartFormula Report |                       |
|-----------------------------------------|---------------------------------------|-----------------------|-----------|-----------------------------------|-----------------------|
| <b>Analysis Info</b>                    |                                       |                       |           | Acquisition Date                  | 6/30/2014 12:14:00 PM |
| Analysis Name                           | D:\Data\Bogges\N2S2Cu-II.d            |                       |           | Operator                          | Bogges                |
| Method                                  | tune_low.m                            |                       |           | Instrument / Ser#                 | micrOTOF-Q 10195      |
| Sample Name                             | N2S2Cu-II                             |                       |           |                                   |                       |
| Comment                                 | N2S2Cu-II in acetonitrile at 4 ul/min |                       |           |                                   |                       |
| <b>Acquisition Parameter</b>            |                                       |                       |           |                                   |                       |
| Source Type                             | ESI                                   | Ion Polarity          | Positive  | Set Nebulizer                     | 0.4 Bar               |
| Focus                                   | Not active                            | Set Capillary         | 4500 V    | Set Dry Heater                    | 180 °C                |
| Scan Begin                              | 50 m/z                                | Set End Plate Offset  | -500 V    | Set Dry Gas                       | 4.0 l/min             |
| Scan End                                | 3000 m/z                              | Set Collision Cell RF | 120.0 Vpp | Set Divert Valve                  | Source                |

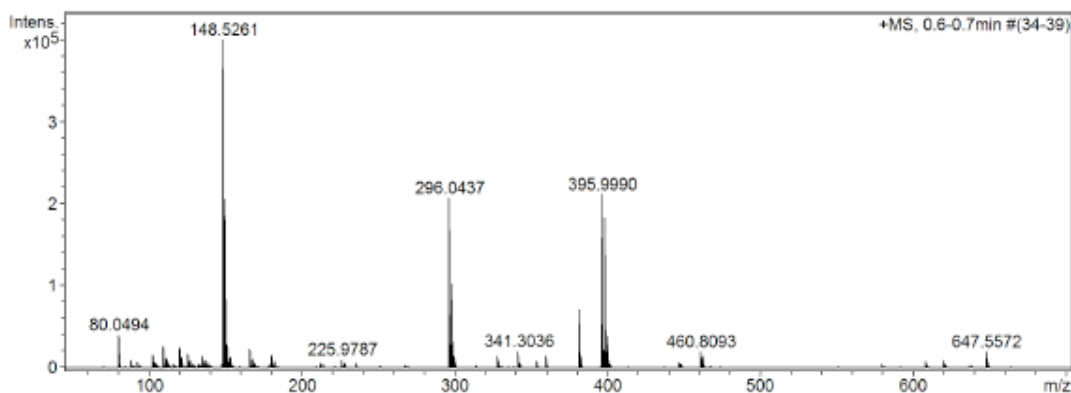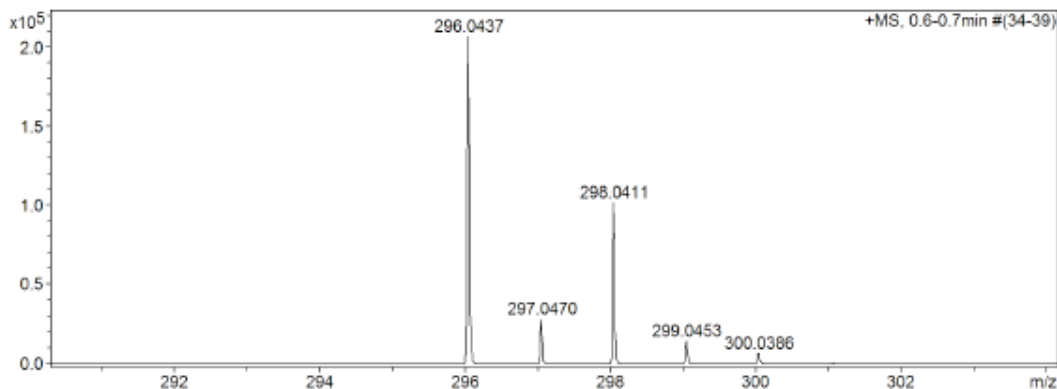

| Meas. #  | Formula                | m/z      | err [ppm] | Mea n err [ppm] | rdb | N-R ul e | e <sup>-</sup> Co nf | mSi gma | Std l | Std Me an m/z | Std l Va rN or m | Std m/z Diff | Std Com b Dev |
|----------|------------------------|----------|-----------|-----------------|-----|----------|----------------------|---------|-------|---------------|------------------|--------------|---------------|
| 296.0437 | 1 C 13 H 17 Cu N 2 S   | 296.0403 | -11.3     | -10.7           | 8.0 | ok       | odd                  | 10.4    | 14.5  | 3.2           | 5.5              | 0.6          | 994.6         |
|          | 2 C 10 H 21 Cu N 2 S 2 | 296.0437 | 0.1       | 0.6             | 1.0 | ok       | odd                  | 21.5    | 28.1  | 0.4           | 7.4              | 0.7          | 872.3         |

Cu<sup>+</sup>[14aneNSNS)]PF<sub>6</sub><sup>-</sup>

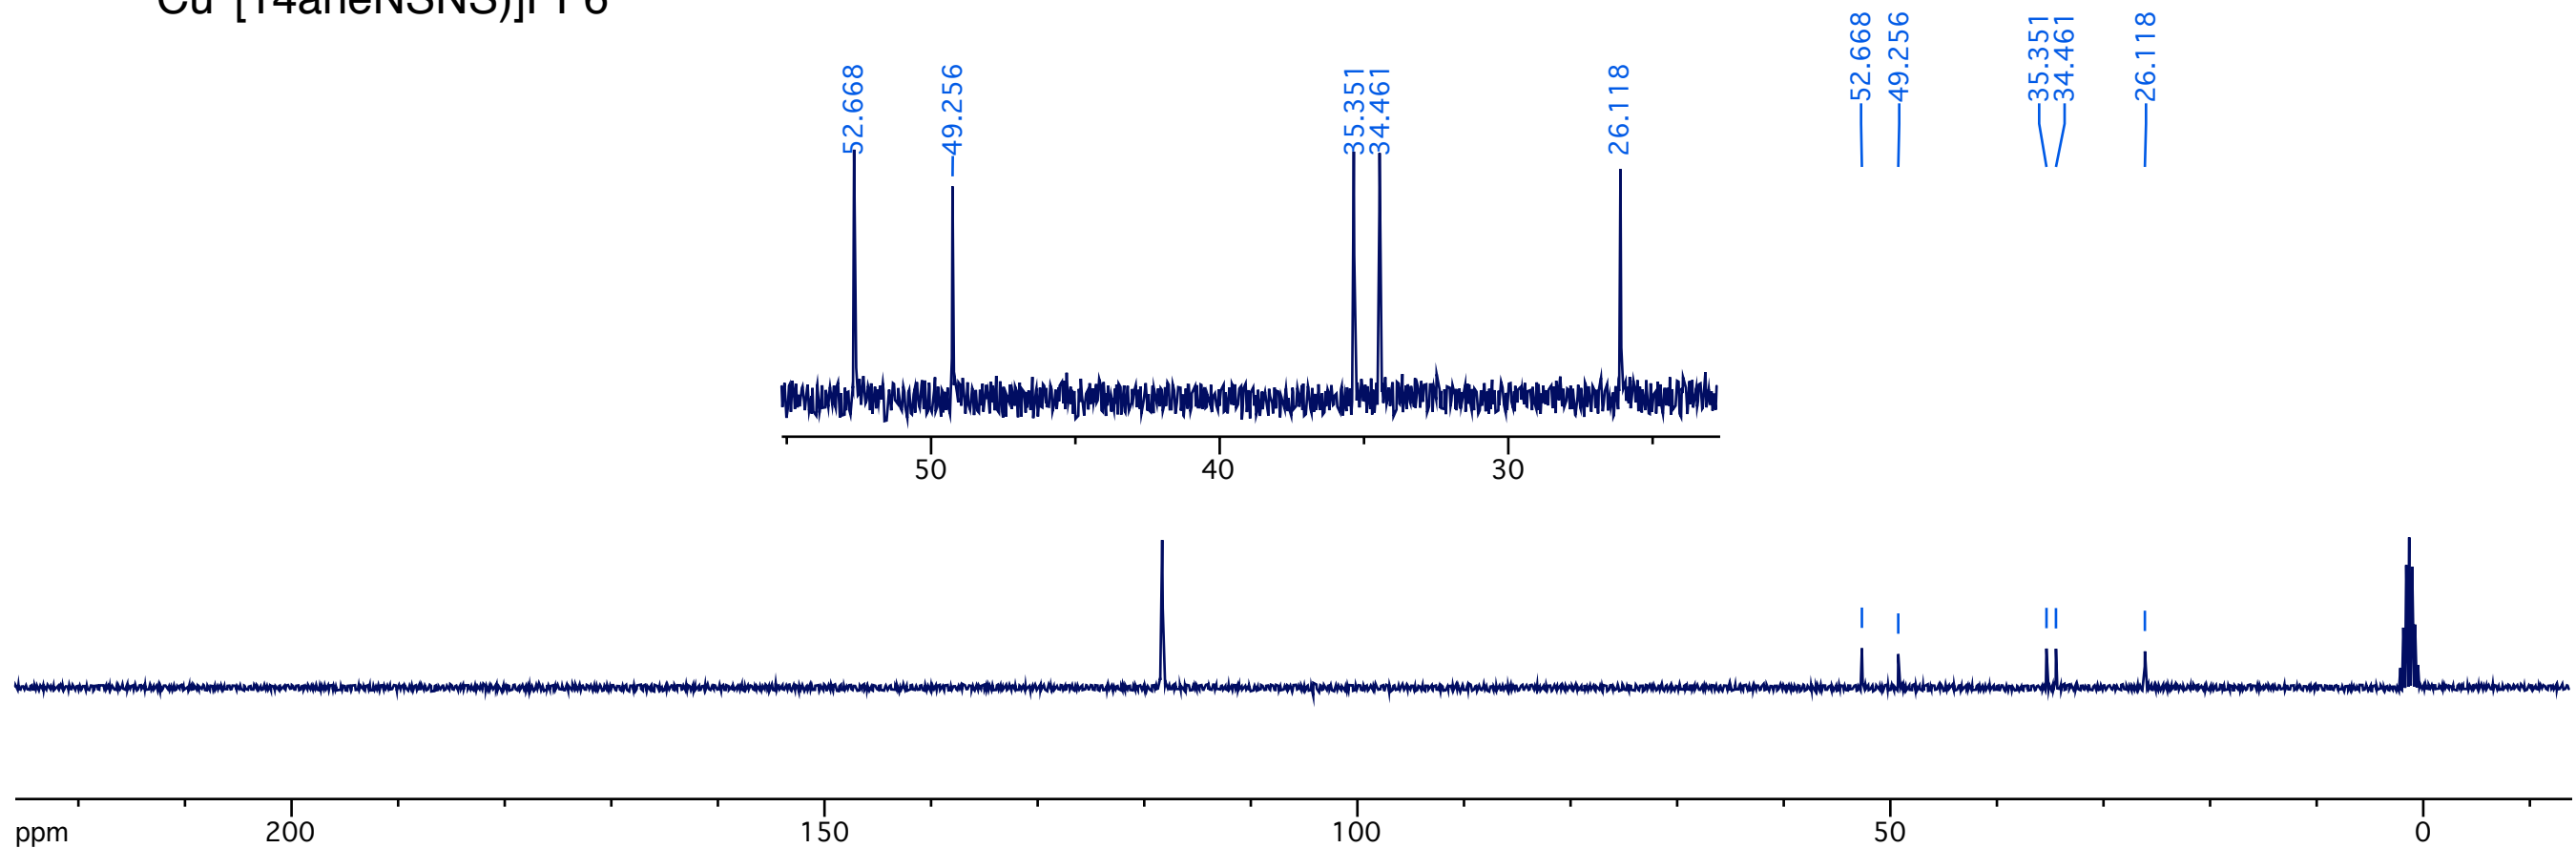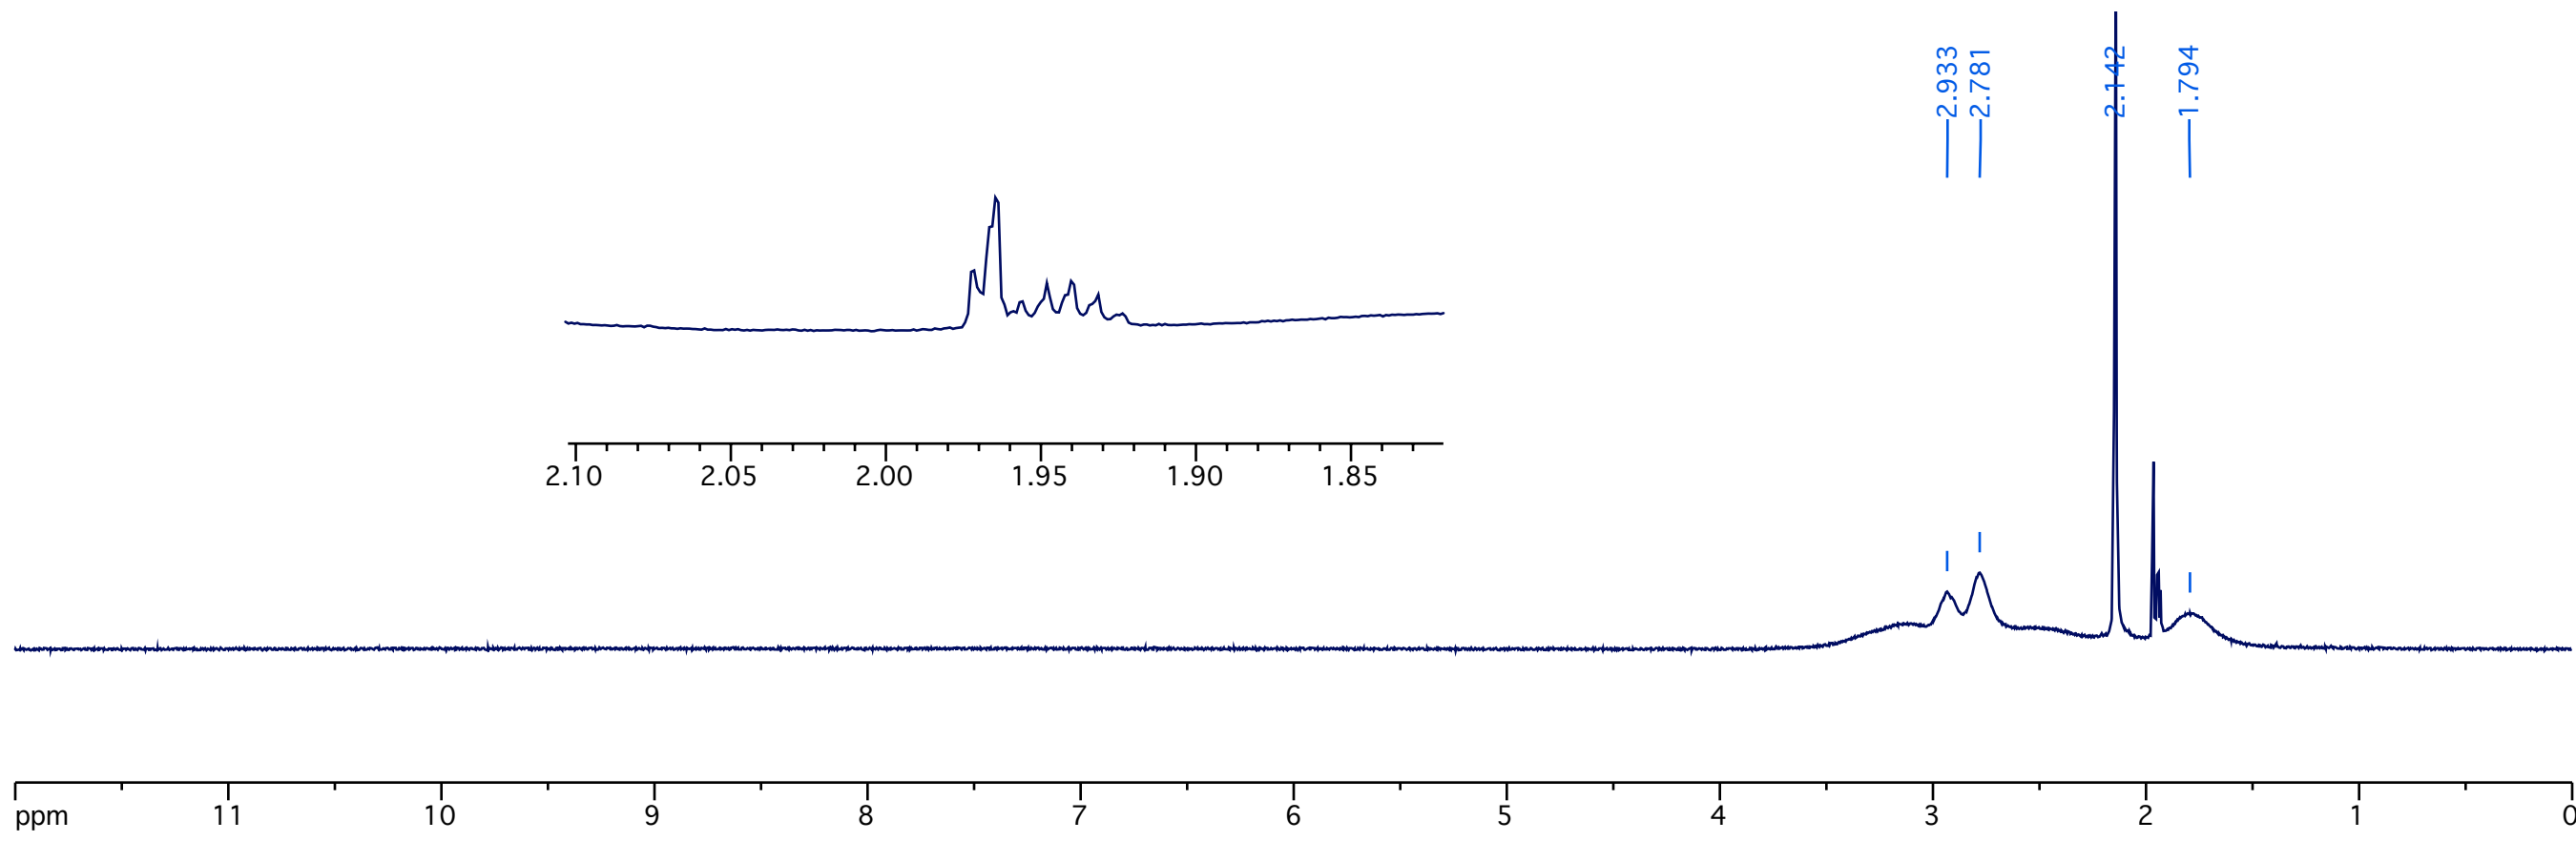



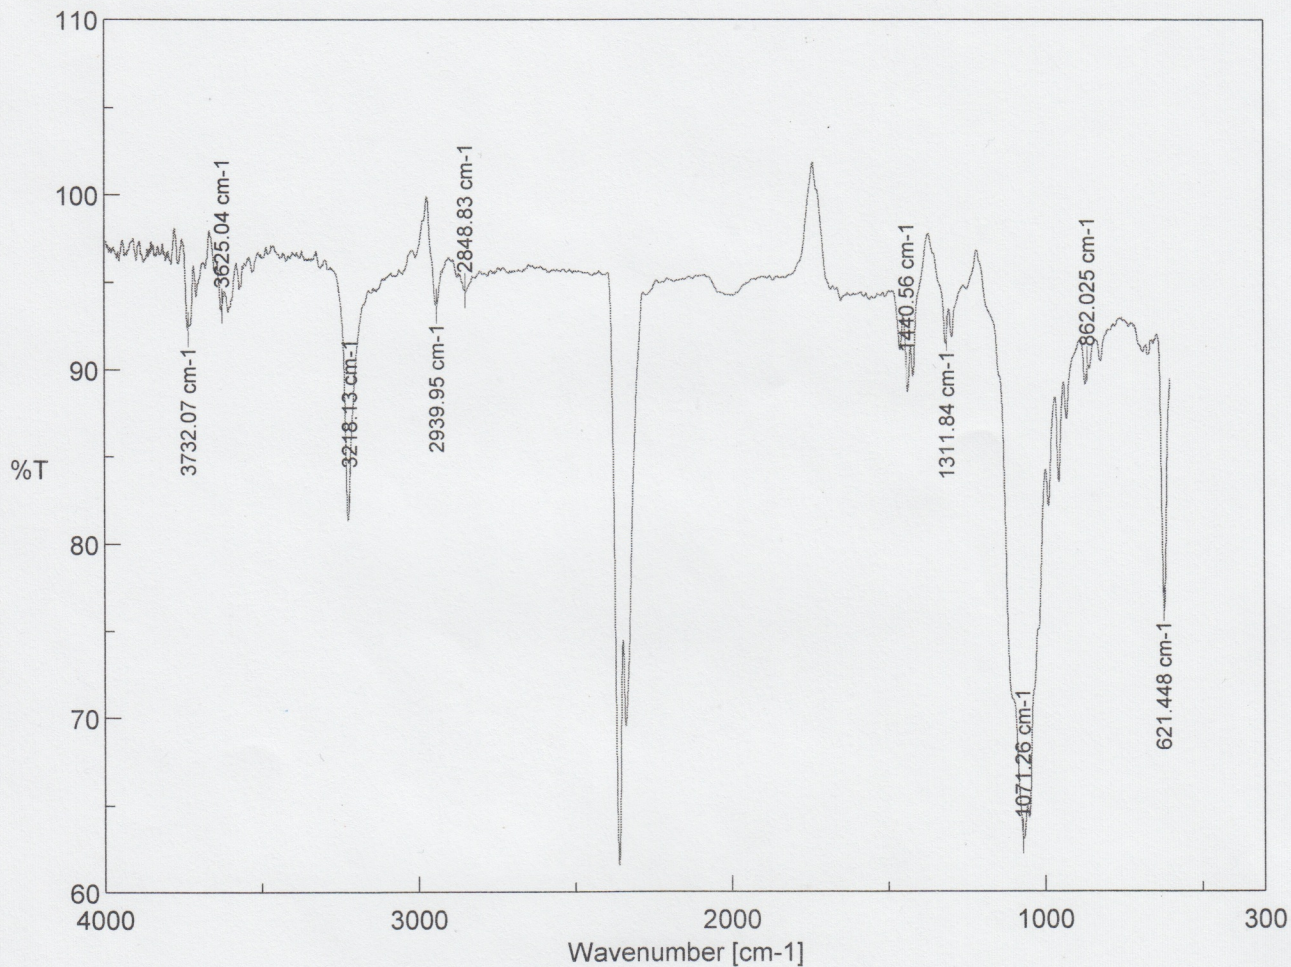

Memory-8

[Comment]

Sample Name  
 Comment  
 User  
 Division  
 Company Indiana U.

[Measurement Information]

Model Name FT/IR-4200typeA  
 Serial Number B008361018

Accessory ATR PRO450-S  
 Accessory S/N A098261272

Light Source Standard  
 Detector TGS  
 Accumulation 100  
 Resolution 2 cm-1  
 Zero Filling On  
 Apodization Cosine  
 Gain Auto (16)  
 Aperture Auto (5 mm)  
 Scanning Speed Auto (2 mm/sec)  
 Filter Auto (30000 Hz)

[Data Information]

Creation Date 10/16/2015 1:42 PM  
 Data array type Linear data array  
 Horizontal Wavenumber [cm-1]  
 Vertical %T  
 Start 599.753 cm-1  
 End 4000.12 cm-1  
 Data pitch 0.482117 cm-1  
 Data points 7054

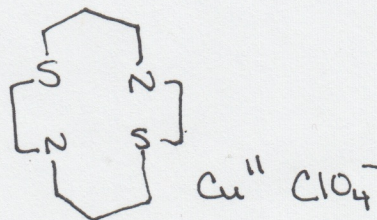



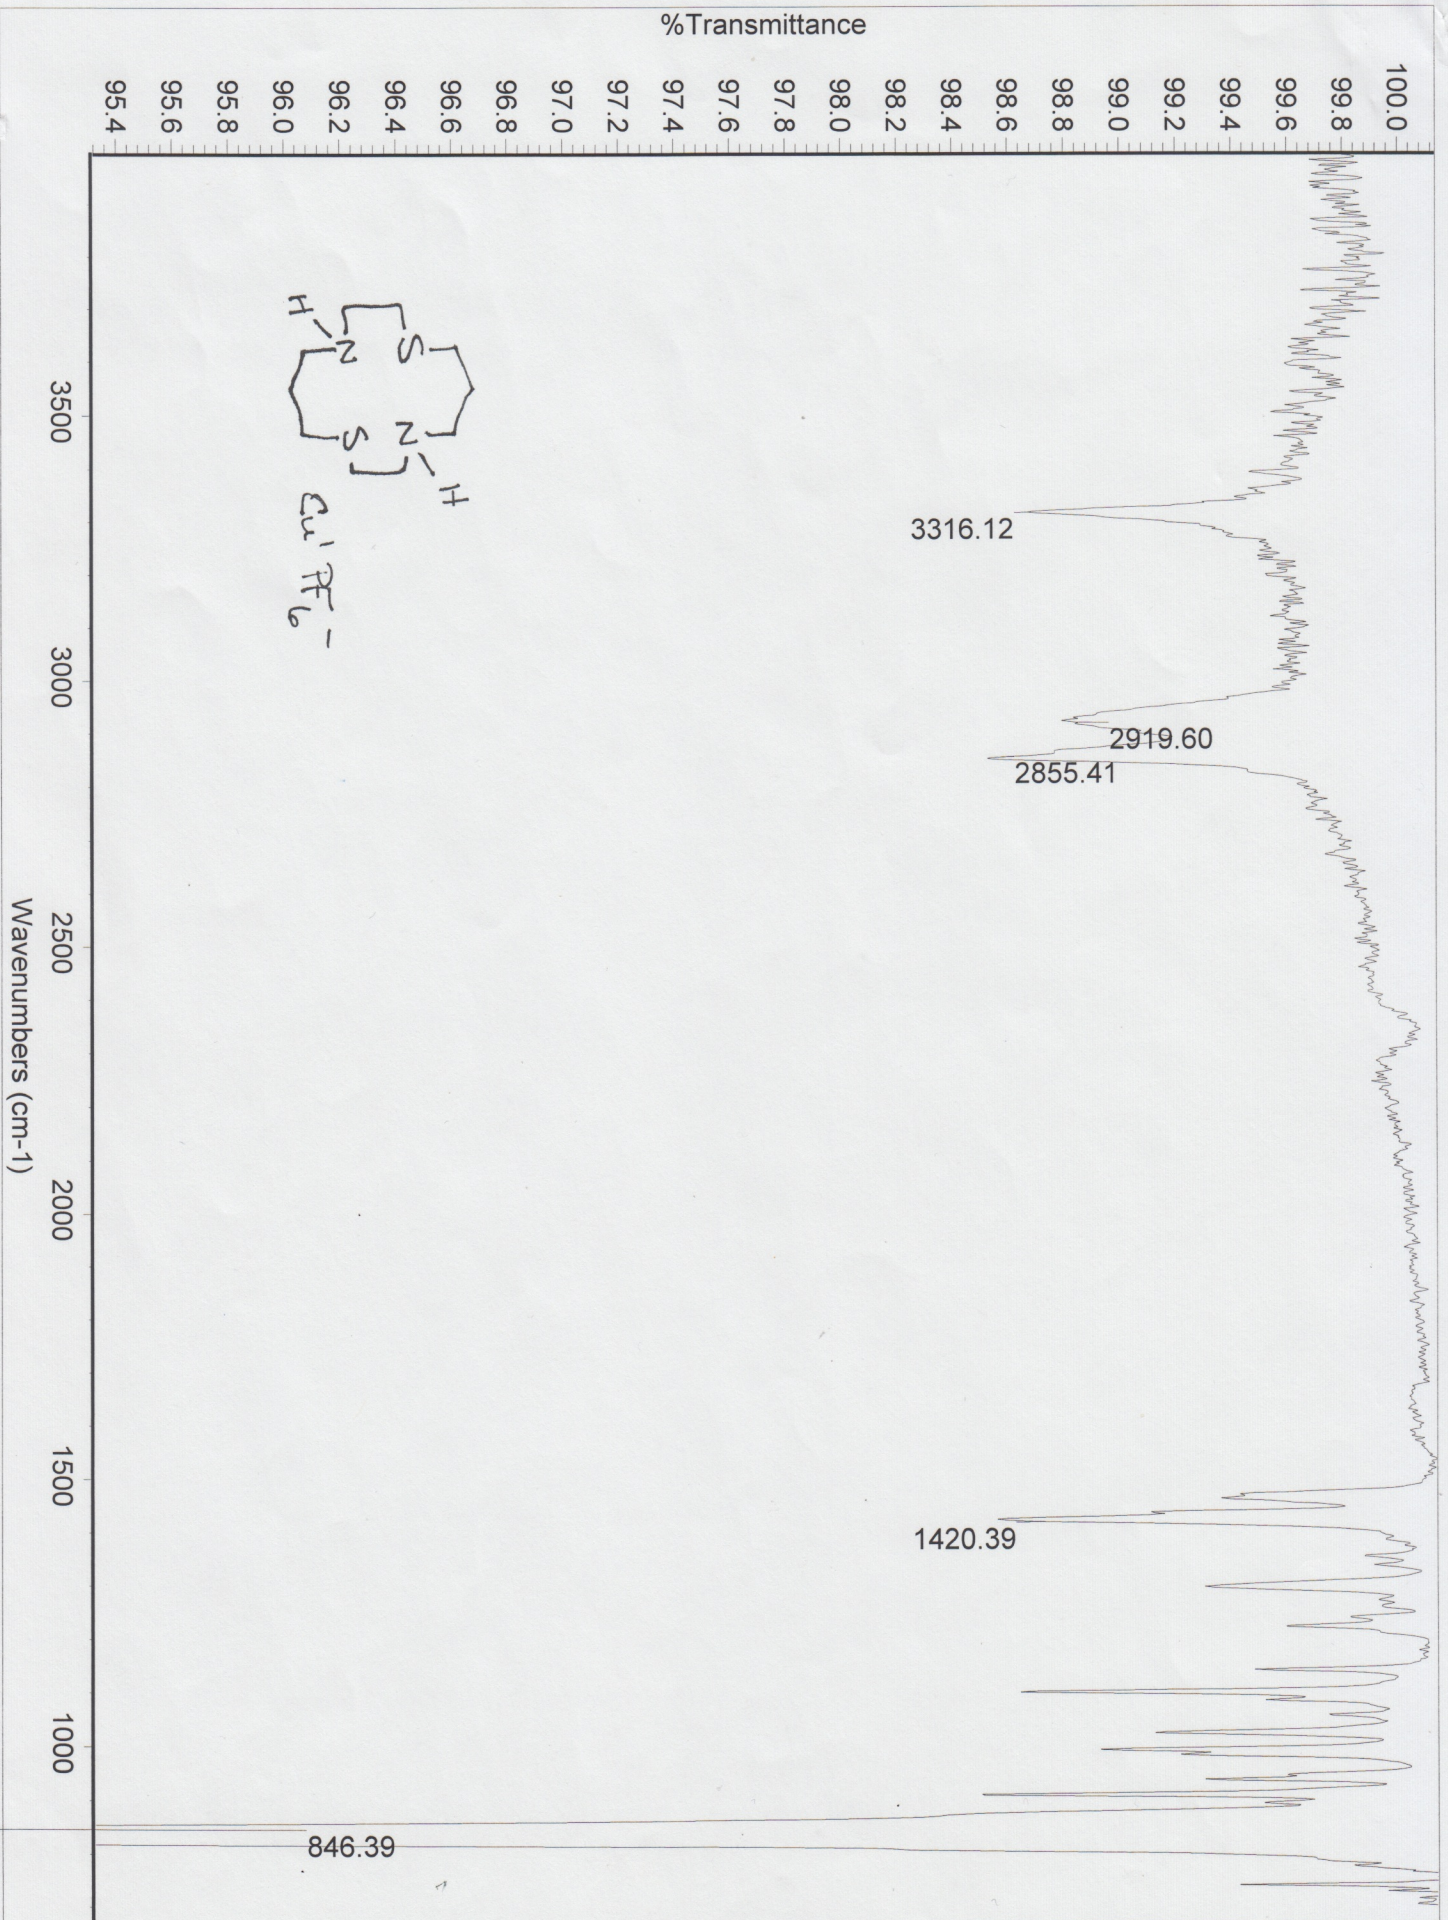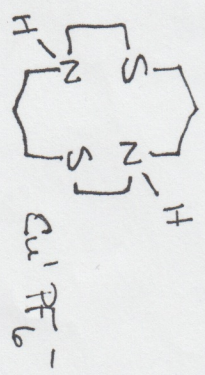

Supplement: c5dt03389f1.pdf [file c5dt03389f1.pdf]
